# Supplementary material for: General practitioners’ perceived indicators of vulnerability in pregnancy- A qualitative interview study
Source: Springer Nature journal article supplement (doi:10.1186/s12875-021-01439-3), 2021-06-26
Supplement: MOESM2 [file 19295664]

## Interview guide

### Character of interview and participants

Focus group interviews with general practitioners (GPs), 3-6 participants (in average 4).

### Short introduction by interviewer

Giving a short presentation of the interviewer (LBV) and moderator (DEJ), emphasizing our like-minded position as GPs and part-time researchers, explaining the study's aims, without disclosing our pre-assumptions.

Overall aim: exploring the GPs experience working with vulnerable pregnant women. Explaining the partial aims.

Instructing the participants: the interview is meant to be an informal discussion, only partially structured. Ensuring that all experience and attitudes are acceptable and of equal importance, that there is no right or wrong, as there are no clear definitions of vulnerable pregnant women. Encouraging participants to share experience of things that were difficult or even went wrong.

Ensuring ethics: anonymous forum, data protection rules, duty of confidentiality

Gaining written consent from participants

| Themes                                     | Questions                                                                                                                                                                                                                                                                                                                                                                                                                                                                                                                |
|--------------------------------------------|--------------------------------------------------------------------------------------------------------------------------------------------------------------------------------------------------------------------------------------------------------------------------------------------------------------------------------------------------------------------------------------------------------------------------------------------------------------------------------------------------------------------------|
| Presentation of all participants           | Practice location, practice type, seniority, average number of pregnancy consultations per month                                                                                                                                                                                                                                                                                                                                                                                                                         |
| Conceptualizing vulnerability in pregnancy | Think of a pregnancy consultation, e.g. the first pregnancy consultation, with a vulnerable woman who made you worry how things would go – define what made you worry. Also, in your own words, define who you consider to be vulnerable pregnant women. Welcoming clinical examples.                                                                                                                                                                                                                                    |
| Organization of antenatal care             | How do you organize antenatal care consultations in your clinic?                                                                                                                                                                                                                                                                                                                                                                                                                                                         |
| Assessing and addressing vulnerability     | Do you, among all other tasks in antenatal care consultations, focus on assessing the vulnerability of the pregnant women?<br>How do you get the suspicion that a pregnant woman might be vulnerable?<br>What might prevent you from thinking about a pregnant woman's vulnerability?<br>When clarifying signs of vulnerability, what do you find important to assess in the patient's medical history?<br>How do you address vulnerability to the pregnant woman and her partner? And what can be difficult to address? |
| The cross-sectoral collaboration           | How do you handle the obtained information about indicators of vulnerability?<br>What do you generally document in the pregnancy chart?<br>Do you typically refer the woman to collaborative partners? Which partners?<br>How do you perceive the cross-sectoral antenatal care collaboration?<br>How do you perceive the task of navigating in the cross-sectoral collaboration?                                                                                                                                        |

PROJECT NAME: RISK ASSESSMENT OF VULNERABLE PREGNANT WOMEN IN GENERAL PRACTICE

|                |                                                                                                                                                                                                                                                                                                                                                                                                                                                                                    |
|----------------|------------------------------------------------------------------------------------------------------------------------------------------------------------------------------------------------------------------------------------------------------------------------------------------------------------------------------------------------------------------------------------------------------------------------------------------------------------------------------------|
|                | <p>How do you perceive the task of communicating with the cross-sectoral partners? (the social-obstetric units, specialists in the secondary sector, municipal health visitors, municipal social authorities)</p> <p>Have you ever made a report to the social authorities about a vulnerable pregnant woman?<br/>In which situation would you find it necessary to report about a vulnerable pregnant woman?<br/>Is it difficult to report on vulnerable pregnant women? Why?</p> |
| Wished changes | <p>What changes might make it easier for you to assess vulnerability among pregnant women?<br/>Do you have wishes for changes in the cross-sectoral collaboration of antenatal care which would ease assessing vulnerable pregnant women?<br/>Do you have wishes for changes in the collective agreement - which would ease assessing vulnerable pregnant women?</p>                                                                                                               |
| Round-off      | Thanking for participation                                                                                                                                                                                                                                                                                                                                                                                                                                                         |
